# Supplementary material for: Abnormal Behavior of Zebrafish Mutant in Dopamine Transporter Is Rescued by Clozapine
Source: PubMed Central journal article supplement — iScience. 2019 Jul 4;17:325–33. doi: 10.1016/j.isci.2019.06.039 (PMC6642228; doi:10.1016/j.isci.2019.06.039), 2019-07-04
Supplement: mmc1.pdf [file mmc1.pdf]

**ISCI, Volume 17**

**Supplemental Information**

**Abnormal Behavior of Zebrafish Mutant  
in Dopamine Transporter Is Rescued by Clozapine**

**Guangliang Wang, Guoqiang Zhang, Zhuyun Li, Caroline H. Fawcett, Matthew Coble, Maria X. Sosa, Tingwei Tsai, Kimberly Malesky, Stefan J. Thibodeaux, Peixin Zhu, David J. Glass, and Mark C. Fishman**

1 **Supplemental Information**

A *slc6a3*<sup>-/-</sup> (allele 1): 7bp deletion on Exon 10

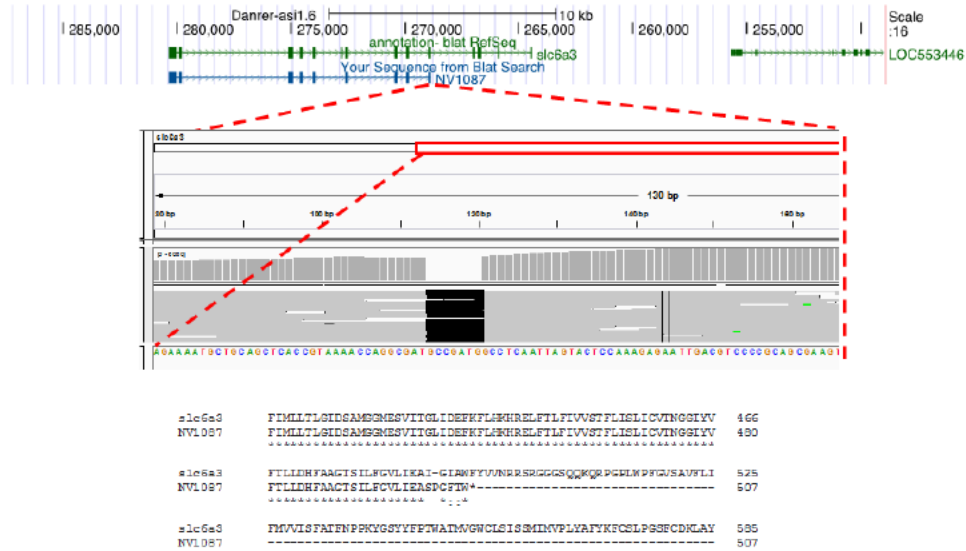

B *slc6a3*<sup>-/-</sup> (allele 2): 4bp deletion on Exon 3

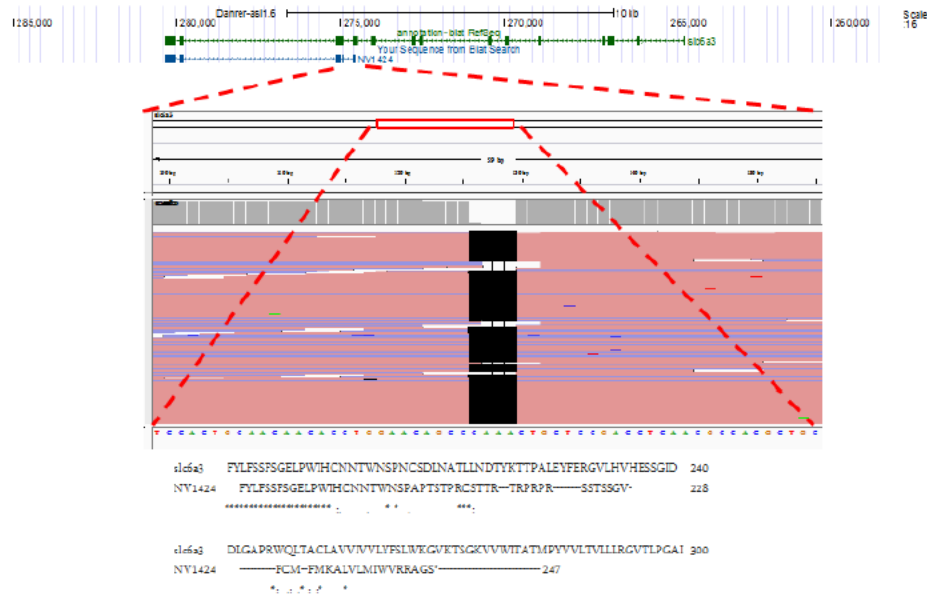

2  
3  
4  
5  
6  
7

**Supplementary Figure 1. Sequence confirmation of CRISPR deletions in the two *slc6a3*<sup>-/-</sup> alleles, related to Figure 1. (A) Mutation in *slc6a3*<sup>-/-</sup> allele1 is a 7bp deletion in Exon10. (B) Mutation of *slc6a3*<sup>-/-</sup> allele2 is a 4 bp deletion in Exon 3.**

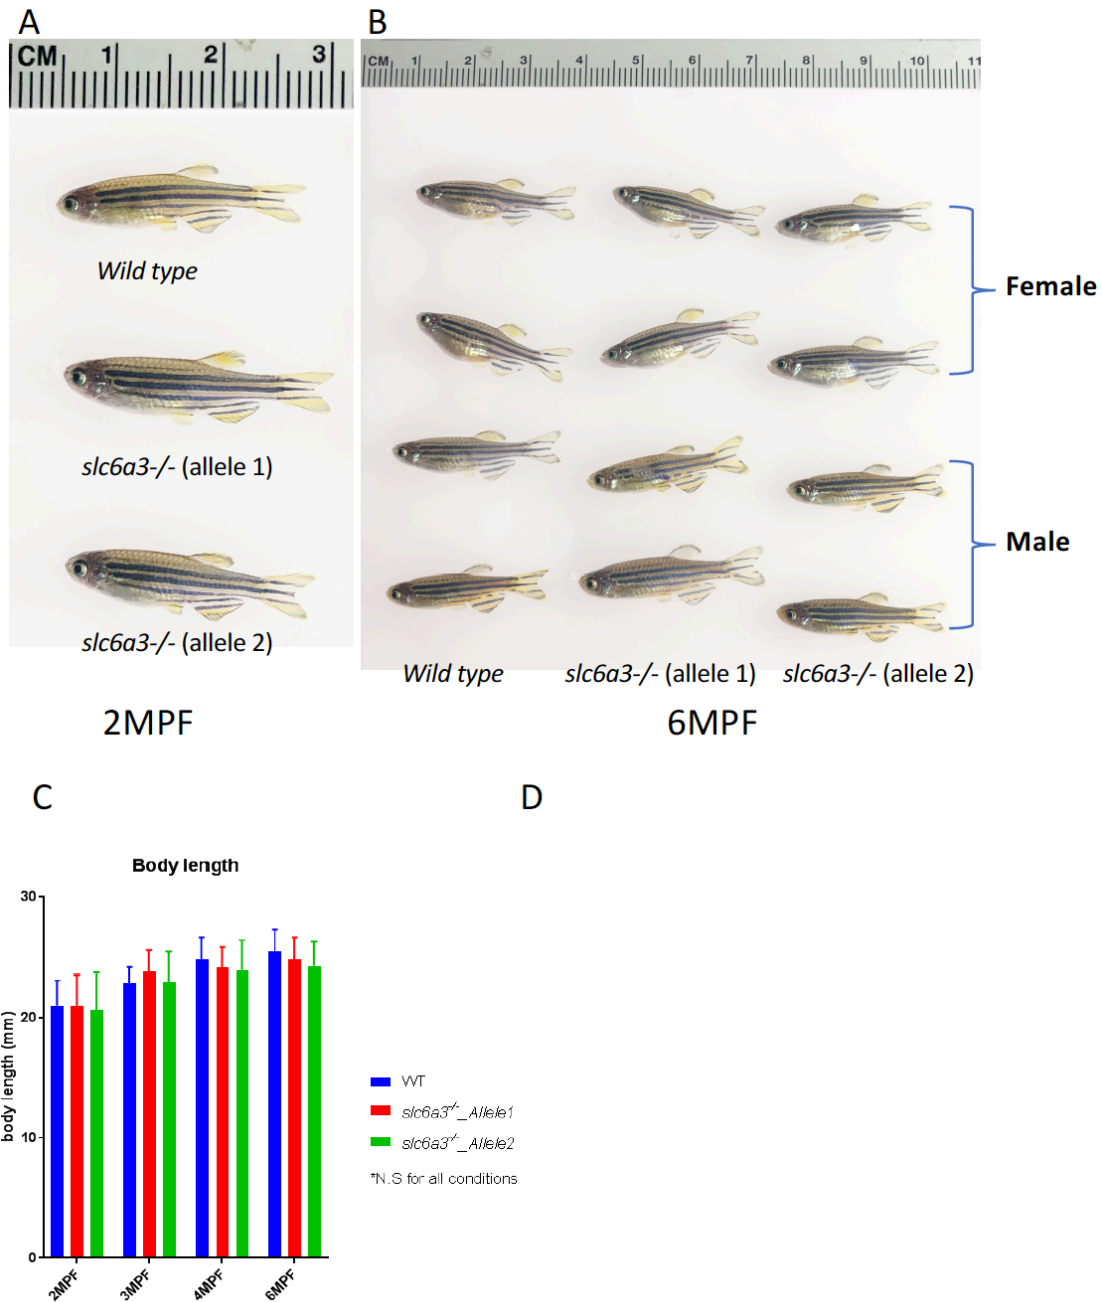

8  
 9  
 10  
 11  
 12  
 13  
 14  
 15  
 16

**Supplementary Figure 2. *slc6a3* knockout does not affect overall morphology and development, related to Figure 1.** (A) Zebrafish images of WT, *slc6a3*<sup>-/-</sup> *allele1*, and *slc6a3*<sup>-/-</sup> *allele2* at 2 months post-fertilization (2mpf). It should be noted that fish do not show gender-related morphology yet at this stage. (B) Zebrafish images of wild-type (WT), *slc6a3*<sup>-/-</sup> *allele1*, and *slc6a3*<sup>-/-</sup> *allele2* at 6 months post-fertilization (6mpf). (C) Fish body length (head to tail) measurement of WT, *slc6a3*<sup>-/-</sup> *allele1*, and *slc6a3*<sup>-/-</sup> *allele2* at 2mpf, 3mpf, 4mpf, and 6mpf. For all n>=16, significance test: one-way ANOVA Kruskal-Wallis test.

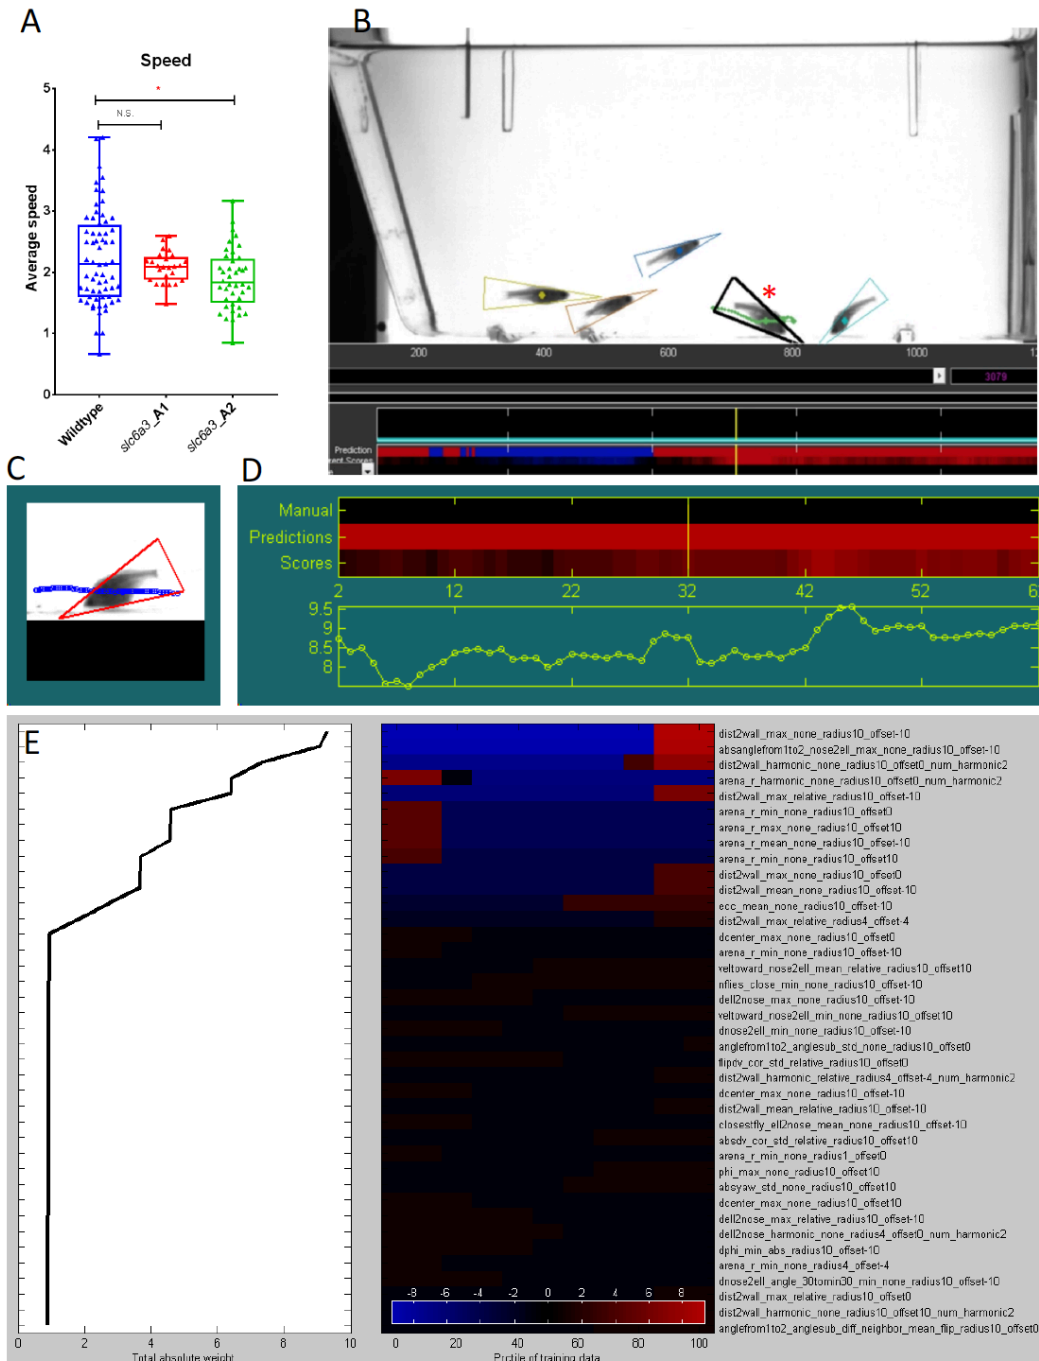

17  
 18 **Supplementary Figure 3. Training the “digging” classifier in JABBA, related to Figure 1.**  
 19 (A) the average swimming speed of WT, *slc6a3*<sup>-/-</sup> allele1, and *slc6a3*<sup>-/-</sup> allele2 ( $n_{WT}=64$ ,  $n_{slc6a3$ <sup>-/-</sup>  
 20 <sub>A1</sub>=25,  $n_{slc6a3$ <sup>-/-</sup><sub>A2</sub>=40,  $*p<0.05$ , N.S.= no significance. Significance test: one-way ANOVA  
 21 Kruskal-Wallis test). (B) The interphase of training “digging” classifier in JABBA. The fish  
 22 posture is highlighted by a triangle (asterisk) with a centroid in the center of the fish. The triangle  
 23 indicates the angles of fish toward to the bottom. (C) The view of individual fish during the

24 training. The blue line indicates the fish trajectory  $\pm 30$  seconds of the timepoint. **(D)** The view of  
25 the “digging” label in a 60 second timeframe. Manual=manually labelled “digging” behavior (left  
26 blank here as the timeframe is randomly selected and not manually labelled).  
27 Prediction=predicted probability after training. Score=the probability score based on on all  
28 weighted features. A score of 0.75 was used for as the threshold for filtering the “digging” motif  
29 in video. **(E)** The rank of total absolute weights of all features for training the “digging” classifier.

30  
31  
32  
33  
34  
35  
36  
37  
38  
39  
40  
41  
42  
43  
44  
45  
46  
47  
48  
49  
50  
51  
52  
53  
54  
55  
56  
57

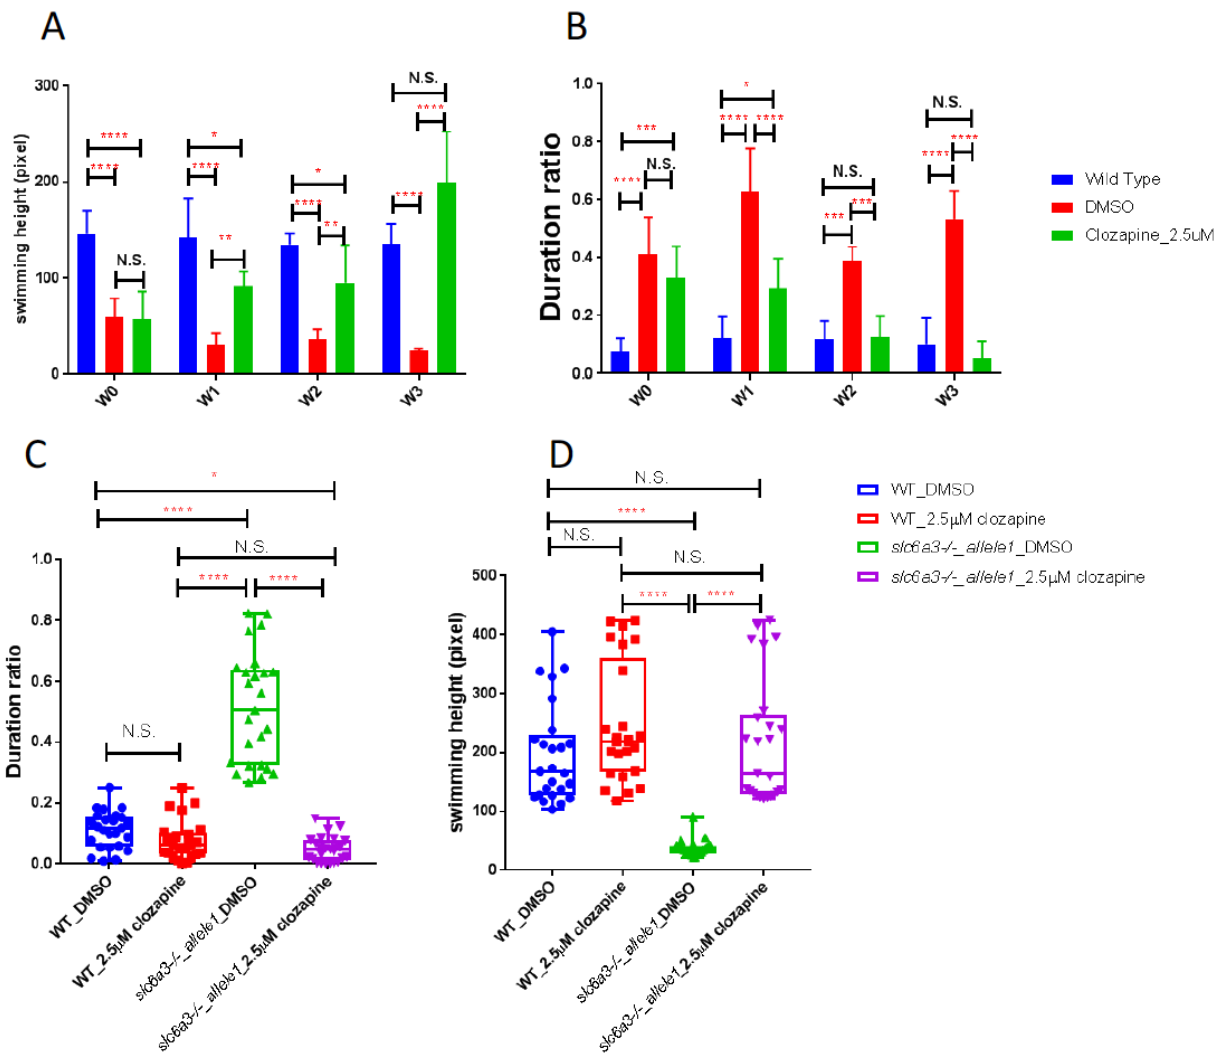

60  
61 **Supplementary Figure 4. Statistical analysis for 2.5uM clozapine treatment. (A-B),**  
62 **related to Figure 3.** The bar-graphs of swimming height (A) and the “digging” behavior (B)  
63 from week zero (W0) to week 3 (W3) in WT, *slc6a3*<sup>-/-</sup> *allele1* treated by DMSO and 2.5uM  
64 clozapine in drug screen. n=5 for all. Error bar=standard deviation. \*\*\*\**p*<0.0001; \*\*\**p*<0.001;  
65 \*\**p*<0.01; \**p*<0.05, N.S.= no significance. Significance test: one-way ANOVA Kruskal-Wallis  
66 test. (C-D) The box plots of swimming height (C) and the “digging” behavior (D) at week 3 in WT  
67 and *slc6a3*<sup>-/-</sup> *allele1* treated by DMSO and 2.5uM clozapine in a follow-up experiment. n=25 for  
68 all conditions. \*\*\*\**p*<0.0001; \*\*\**p*<0.001; \**p*<0.05, N.S.= no significance. Significance test: one-  
69 way ANOVA Kruskal-Wallis test.



81 both WT and *slc6a3*<sup>-/-</sup> *allele1*. \**p*<0.05. Significance test: Wilcoxon–Mann–Whitney test. **(D)**  
82 TH+ neuronal number is unaffected in other regions of the *slc6a3*<sup>-/-</sup> *allele1* brain. Error  
83 bar=standard deviation. N>=8 for both WT and *slc6a3*<sup>-/-</sup> *allele1* conditions. N.S.=no  
84 significance. Significance test: Wilcoxon–Mann–Whitney test. **(E-H)** 2.5uM clozapine treatment  
85 does not significantly rescue the A9 cell number in *slc6a3*<sup>-/-</sup> *allele1*. **(E-G)** Representative  
86 images of A9 neurons by z-projection of A9 neuron images. Scale bar=10µm. **(H)** Box plot of A9  
87 DA cell number in wild-type, DMSO and 2.5uM clozapine treated *slc6a3*<sup>-/-</sup> *allele1* at 3mpf. For  
88 all n>=12. Error bar=standard deviation. \*\**p*<0.01. N.S.=no significance. Significance test: one-  
89 way ANOVA Kruskal-Wallis test.  
90  
91  
92  
93  
94  
95  
96  
97  
98  
99  
100  
101  
102  
103  
104  
105  
106  
107  
108  
109  
110  
111  
112  
113  
114



115  
116

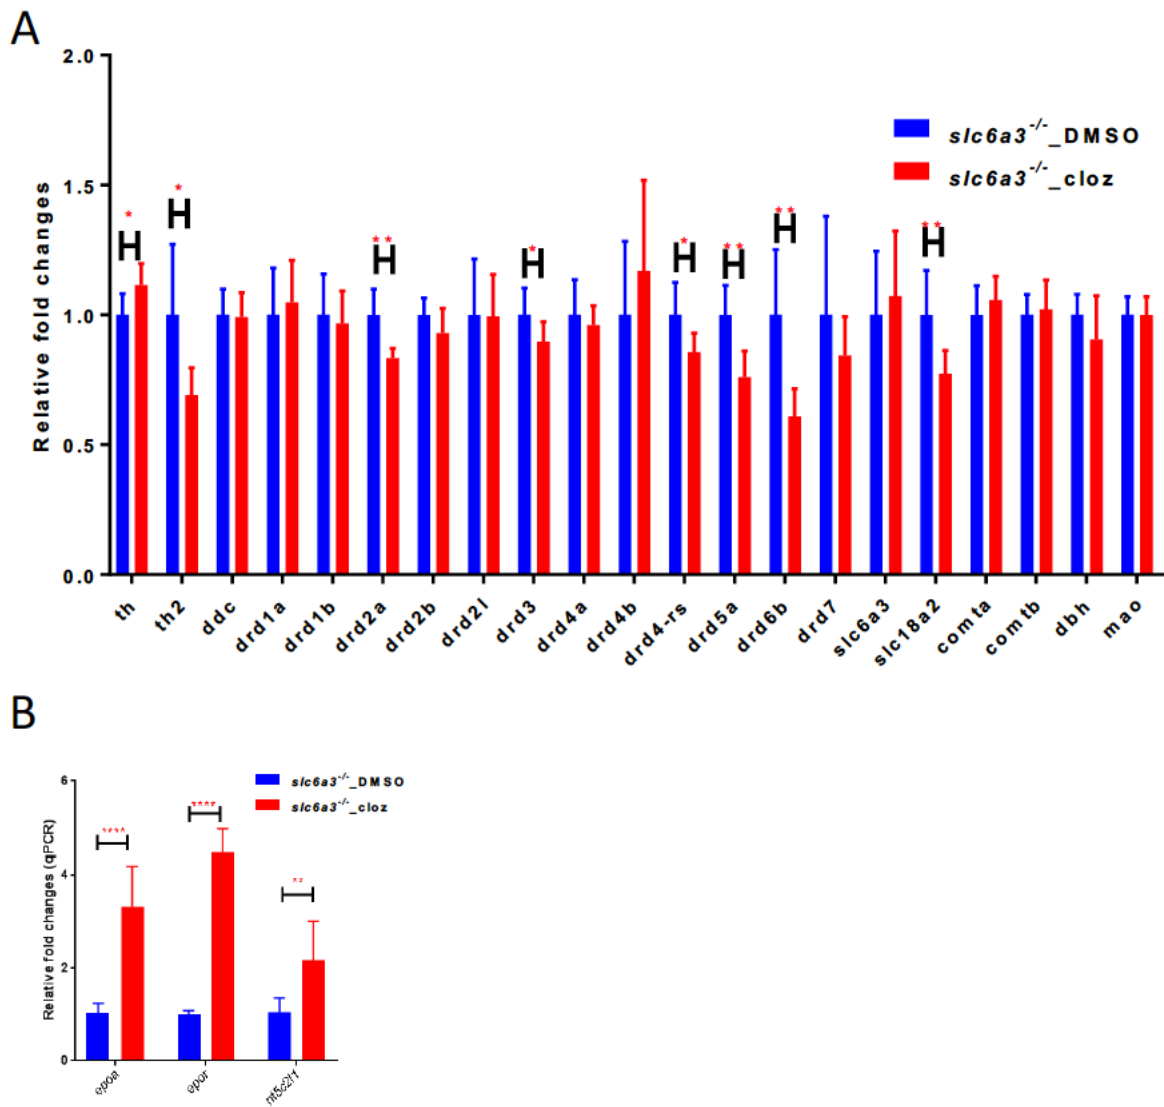

117  
118  
119  
120  
121  
122  
123  
124  
125  
126

**Supplementary Figure 6. Erythropoietin and 5'-nucleotidase pathway genes are upregulated by clozapine treatment in *slc6a3*<sup>-/-</sup> allele1, related to Figure 4. (A)** The relative fold changes of all dopamine pathway genes by RNA-seq analysis, show minimal changes in gene expression levels. n=8 for all. Error bar=standard deviation. \*\* $p < 0.05$ , \* $p < 0.01$ . N.S.=no significance. Significance test: Wilcoxon–Mann–Whitney test. **(B)** qRT-PCR confirms the up-regulations of *epoa*, *epor*, and *nt5c2l1* in *slc6a3*<sup>-/-</sup> allele1 by 2.5uM clozapine treatment. n=6 for all. \*\* $p < 0.01$ . \*\*\*\* $p < 0.0001$ . Significance test: Wilcoxon–Mann–Whitney test.

127 **Supplementary Video 1.** Wild-type behavior, related to Figure 1.  
128 **Supplementary Video 2.** *slc6a3*<sup>-/-</sup> allele1 behavior, related to Figure 1.  
129 **Supplementary Video 3.** *slc6a3*<sup>-/-</sup> allele2 behavior, related to Figure 1.  
130 **Supplementary Video 4.** *slc6a3*<sup>-/-</sup> allele1 behavior with 3-week DMSO treatment, related to  
131 Figure 3.  
132 **Supplementary Video 5.** *slc6a3*<sup>-/-</sup> allele1 behavior with 3-week 2.5uM clozapine treatment,  
133 related to Figure 3.  
134 **Supplementary Video 6.** *slc6a3*<sup>-/-</sup> allele1;*Tg(aTub:iTTA; TetO:EpoA-2a-GFP)* behavior at 2  
135 months post fertilization, related to Figure 4.  
136 **Supplementary Excel table.** Normalized RNA-seq counts of all genes in *slc6a3*<sup>-/-</sup> allele1  
137 treated by DMSO and 2.5uM clozapine, related to Figure 4.  
138

## 139 **Transparent Methods**

### 140 **Animal husbandry**

141 Zebrafish (*Danio rerio*) were housed in 3L tanks in a recirculating Aquatic Habitats facility  
142 (Pentair, USA) at 28±0.5°C water temperature. Fish were maintained on a 14-hour light/10-hour  
143 dark cycle with light turning on at 07:00 AM. Fish were fed a diet of brine shrimp (Catalog  
144 #BSEPCA-Brine Shrimp Direct, USA) twice daily and supplemented with flake fish food  
145 (Tetramin, Catalog# 98525-Pentair, USA) daily. All animals were maintained and procedures  
146 were performed in accordance with the Institutional Animal Care and Use Committees (IACUC)  
147 of NIBR.  
148

### 149 **Generation of the CRISPR mutants**

150 The *slc6a3* CRISPR sgRNAs were designed based on an in-house genome assembly of the AB  
151 strain (unpublished, sequences available upon request). Two sgRNAs targeting different loci  
152 were selected (Table 1). sgRNAs were synthesized using T7 in vitro transcription using the  
153 MEGAshortscript™ T7 Transcription Kit (ThermoFisher, AM1354). Then sgRNAs were purified  
154 with MEGAclean™-96 Transcription Clean-Up Kit (ThermoFisher, 325 AM1909). The purified  
155 sgRNAs (125 ng/μL) were co-injected with Cas9 protein (500 ng/μL PNA bio, CP01) into 1-cell  
156 stage fertilized zebrafish embryos. CRISPR injected embryos were raised to adulthood and  
157 crossed with wild-type AB fish to get F1 generation. Mutants were identified in the F1 and  
158 maintained in heterozygous.  
159

### 160 **Behavioral assay**

161 For behavioral analysis, we used a side-mounted camera (acA2000-165u mNIR, Basler) on a  
162 standard 1.4 L fish tank (Pentair, USA). To make the background uniform for tracking, a  
163 25cmX25cm IR illuminating board was placed behind the fish tank for illumination. An optical  
164 filter (LP780-72 filter, MidOPT) was placed on a lens (LM8XC 1.3" (4/3") 8.5mm, F2.8, KOWA)  
165 to permit only infrared light being recorded. Five fish were netted into 1L fish water in the fish  
166 tank. After 5min acclimation, a 30min fish swimming video was recorded. The video dimension  
167 was 1224X500 (pixels). The recording frequency was 60hz. The video was tracked and  
168 annotated using Janelia Automatic Animal Behavior Annotator (JAABA) following the tutorial  
169 (<http://jaaba.sourceforge.net>) (Kabra et al., 2013). In total, eight 30min videos (240 minutes)  
170 were used for the “digging” classifier training (4 wild-type, 2 slc6a3<sup>-/-</sup> allele1, and 2 slc6a3<sup>-/-</sup>  
171 allele2). The parameters for training are: Iterations:100; Iterations for fast update: 10; Base  
172 Classifier: Decision Stumps; Sample points:2500; Bin:30; Cross Validation Fold: 7. All available  
173 features (appearance, social, locomotion, arena, position, identity, compatibility) were applied in  
174 the training. The weights of individual sub-features were ranked based on manual label  
175 (**Supplementary Figure 3B-E**). For the “digging” classifier, an accuracy of 94.1% was achieved  
176 in the positive frames (when fish show the “digging” behavior) and 98.2% in the negative frames  
177 (when fish do not show the “digging” behavior).

178

### 179 **Whole brain immunofluorescence and TH+ cell counting**

180 Whole brain immunofluorescence was adapted from the CUBIC clearing method (Susaki et al.,  
181 2015). Briefly, adult zebrafish were euthanized in ice-cold water and decapitated. The heads  
182 were fixed in 4% PFA for overnight at 4 °C. Then the brains were dissected and incubated in the  
183 Clearing reagent (250mg/mL urea; 250mg/mL N,N,N',N'-tetrakis (2-hydroxypropyl)  
184 ethylenediamine; 150mg/mL Triton X-100) at 37 °C with shaking for 4 days. The cleared brains  
185 were then incubated in blocking solution (1XPBS, 0.2% Triton X-100, 10% DMSO, 10% goat  
186 serum) at 37 °C for 1 day. The primary antibody (Anti-Tyrosine Hydroxylase (TH) , EMD  
187 Millipore, AB152) was added and incubated at 37 °C for 4 days. Following 1-day wash by wash  
188 solution (1XPBS, 0.1% Tween-20, 1% DMSO), the secondary antibodies (Alexa Fluor® 488  
189 goat anti rabbit, ThermoFisher, A27034) were added and incubated at 37°C for 4 days. After 1  
190 day wash, the samples were transferred into refractive index matching solution (RIMS) (30mL of  
191 0.02 M phosphate buffer (Sigma P5244), 40g Histodenz (Sigma D2158), 0.1% Tween-20,  
192 0.01% sodium azide, use NaOH adjust pH to 7.5) and imaged using a ZEISS lightsheet  
193 microscope with a 5X detection objective (Lightsheet Z.1, Zeiss). Images were processed using  
194 “lightsheet dualfusion” with default parameters in ZEN (Zeiss). Processed images were then

195 quantified using Arivis Vision4D software (Arivis Inc.) and FIJI (NIH). For counting of TH+ cells,  
196 the TH+ channel and the planes of interest were selected in ARIVIS Vision4D analysis panel. A  
197 filter of basic morphology (type: opening; radius:5) and a segmentation of blob finder (diameter  
198 14um, threshold 17.32, high split sensitivity) were applied. After assessing the segmentation  
199 result we manually corrected the false positive segmentation. We used FIJI to generate all  
200 manuscript images.

201

## 202 **RNA-seq and data process**

203 Adult Zebrafish were euthanized by submersion in ice-cold water for 5min. The brains were  
204 dissected in RNAlater solution (ThermoFisher, AM7020). Total RNA from single zebrafish brains  
205 was prepared using the RNeasy Plus 96 Kit (Qiagen, 74192). mRNA libraries were generated  
206 using the TruSeq Stranded mRNA Library Prep Kit (Illumina, 20020595), and sequenced on  
207 Illumina HiSeq 2000 in paired-end mode. Four female and four male adult fish were sequenced  
208 for each condition at a mean depth of 34 million reads per sample. RNA sequencing reads were  
209 trimmed using Trimmomatic (version 0.32) to remove sequencing adaptors and low quality  
210 reads, mapped to internal zebrafish genome using STAR 2.5.3a with default parameters, and  
211 QCed using CollectRnaSeqMetrics from the picard-tools 1.113 package. An rRNA genome  
212 annotation generated using RepeatMasker prediction was downloaded from the UCSC genome  
213 browser and used for CollectRnaSeqMetrics; Uniquely mapped fragments were counted against  
214 a customized gtf file generated based on ENSEMBL zebrafish gene annotation (release 91).  
215 The featureCounts function (featureCounts -p -O -s 2) in the subread (version 1.5.0) package  
216 was used for counting. Differential brain gene expression analysis between DMSO and  
217 clozapine treatment was performed using DESeq2. The log<sub>2</sub> fold changes were tested against 0  
218 using the Wald test, and the p-values were adjusted using Benjamini-Hochberg multi-  
219 comparison correction.

220

## 221 **Total RNA extraction and qRT-PCR**

222 Adult Zebrafish were euthanized by submersion in ice-cold water for 5min. The brains were  
223 dissected in RNAlater solution (ThermoFisher, AM7020). Total RNA of zebrafish brain was  
224 prepared using RNeasy mini kit (Qiagen). The concentration of total RNA was measured and an  
225 equal amount of total RNA for all conditions was reverse transcribed using iScript™ Reverse  
226 Transcription Supermix (Bio-Rad, 1708840). The same amount of templates was used for qPCR  
227 with iTaq™ Universal SYBR® Green Supermix (Bio-Rad, 1725120) in QuantaStudio 7 Real-  
228 Time PCR (ThermoFisher Scientific). The sequences of all qPCR primers are listed in Table 2.

229

### 230 **Cloning and overexpression of *epoa* in zebrafish brain**

231 The *epoa* overexpression construct was cloned using a 3-way Gateway strategy based on the  
232 previously published Tol2kit cloning method (Kwan et al., 2007). A sequence of *epoa-2a-EGPF*  
233 flanked with a recombination sequence for the LR reaction were synthesized by Genewiz. A  
234 Gateway reaction was performed using LR Clonase™ II Plus enzyme (ThermoFisher,  
235 12538120) to assemble three pieces of DNA fragments (5'-entry clone (TetO promoter), middle-  
236 entry clone (*epoa-2a-EGPF* cDNA), 3'- entry clone (PolyA tail)) into the destination vector  
237 (pDestTol2) at room temperature for overnight. The confirmed construct containing all DNA  
238 fragments (*TetO: epoa-2a-EGPF-PolyA*) was co-injected with a neuronal alpha-tubulin promoter  
239 driven itTA (*aTub:itTA*) and the Tol2 transposase mRNA in the *slc6a3<sup>-/-</sup>-allele1* embryos at one-cell  
240 stage. The *epoa* expression level was verified by qRT-PCR of injected embryos at 5dpf. A  
241 stable transgenic line *slc6a3<sup>-/-</sup>-allele1; Tg(aTub:iTTA; TetO:EpoA-2a-GFP)* was screened by  
242 visualizing GFP fluorescence in the brain of progeny of injected fish.

243

### 244 **Dopamine concentration measurement in whole zebrafish brains**

245 Adult Zebrafish were euthanized using ice-cold water for 5min. The brains were dissected on an  
246 ice-cold stage and weighed using a Micro-balance (Mettler Toledo XPE56). The samples were  
247 randomized and transferred to Precellys tissue homogenizing CKmix tubes. Three hundred  
248 microliters of (70/30) acetonitrile/water containing 0.5% ascorbic acid and the dopamine internal  
249 standard 10 µM (Cambridge Isotopes d4) was added to each of the samples. The samples were  
250 homogenized at 2500 RPM for 3X30 seconds and then spun at 10,000 rpm for 10 minutes at  
251 4°C. Fifteen microliters of the sample was transferred to a 384 well plate containing 30 µL of  
252 100 mM borate buffer pH 9.0 and 15 µL of anhydrous acetonitrile containing 2% (v/v) benzoyl  
253 chloride (Sigma Aldrich) was added. The plate was sealed and shaken for 15 minutes.  
254 Calibration curves for dopamine starting at 125 µM were diluted 1:2 over 16 points. Calibration  
255 curves were treated the same as the samples. The samples and calibration curves were then  
256 transferred to an Agilent 1290 auto-sampler set a 4°C and 5 µL was injected onto a 2X50 mm  
257 ACE Excel 2 C18-Amide column connected to a Sciex 5500 operating in MRM mode. Solvent A  
258 was HPLC grade water containing 20 mM ammonium formate and 0.15% formic acid (v/v).  
259 Solvent B was HPLC grade acetonitrile. The flow rate was 600 µL per minute and the column  
260 was keep at a constant temperature of 60°C. The gradient was 100% A to 45% B over 5.5  
261 minutes then to 51% B 4.5 minutes then a stepped to 95% B in 0.15 minutes and held at 95% B  
262 for 1 minutes. The column was then re-equilibrated at 0% percent A for 5 minutes. The mass

263 spectrometry parameters were Gas 1 30, Gas 2 20, CUR 30, Temp 450°C, collision gas 6,  
264 IonSpray Voltage 5500. The MRM for dopamine is 466.2-105.1 and for dopamine IS 470.2-  
265 105.1 DP 75, CE 40 and CXP 10. Dopamine eluted at 7.9 minutes. The data was processed  
266 using MultiQuant™. Dopamine concentrations were divided by the brain weights for  
267 normalization and then compared using JMP™ software by performing a t-test.

268

### 269 **Supplementary Reference**

270 Kabra, M., Robie, A.A., Rivera-Alba, M., Branson, S., and Branson, K. (2013). JAABA:  
271 interactive machine learning for automatic annotation of animal behavior. *Nat Methods* 10,  
272 64-67.

273

274 Kwan, K.M., Fujimoto, E., Grabher, C., Mangum, B.D., Hardy, M.E., Campbell, D.S., Parant, J.M.,  
275 Yost, H.J., Kanki, J.P., and Chien, C.B. (2007). The Tol2kit: a multisite gateway-based  
276 construction kit for Tol2 transposon transgenesis constructs. *Dev Dyn* 236, 3088-3099.

277

278 Parker, M.O., Brock, A.J., Walton, R.T., and Brennan, C.H. (2013). The role of zebrafish  
279 (*Danio rerio*) in dissecting the genetics and neural circuits of executive function. *Front*  
280 *Neural Circuits* 7, 63.

281

282 Susaki, E.A., Tainaka, K., Perrin, D., Yukinaga, H., Kuno, A., and Ueda, H.R. (2015). Advanced  
283 CUBIC protocols for whole-brain and whole-body clearing and imaging. *Nat Protoc* 10,  
284 1709-1727.

285
